# Supplementary material for: The Carboxy-Terminal Domain of Dictyostelium C-Module-Binding Factor Is an Independent Gene Regulatory Entity
Source: PubMed Central journal article supplement (PMC2661138; doi:10.1371/journal.pone.0005012), 2009-04-03
Supplement: pone.0005012.s005.pdf [file pone.0005012.s005.pdf]

**Supplemental Table 4: List of primers used in this study.**

| <b>Primer</b> | <b>Sequence 5'→3'</b>                                                     |
|---------------|---------------------------------------------------------------------------|
| acaA-04       | CATTCTAGAGGCGGTATTGGCAGTATCACC                                            |
| acaA-09       | GGAGAAAATGTCTGATTTTCGCTTTGGATG                                            |
| csaA-05       | GAAAGCTGGTATCTCAAATGTTGTCAC                                               |
| csaA-06       | GGAATCTGGAGCACAACTATATCAGTAG                                              |
| gpdA-01       | GGTTGTCCCAATTGGTATTAATGG                                                  |
| gpdA-02       | CCGTGGGTTGAATCATATTTGAAC                                                  |
| DDB0169268-01 | CACCTCGTGTTGGTGATTCTGT                                                    |
| DDB0169268-02 | CGCATGTTTGGTCTTCACCACT                                                    |
| DDB0191305-01 | CCACAACATTTGACAACTCAAAC                                                   |
| DDB0191305-02 | GCTGGTG CAGTTTCTTTTGG                                                     |
| DDB0204558-01 | TCAACAGTTAGGTGGTGGCTGT                                                    |
| DDB0204558-02 | GGCGGACTGTTACAAGCAAAT                                                     |
| DDB0187209-01 | TGGTTGTAATTGTGCACCAGCC                                                    |
| DDB0187209-02 | TTGGGCAAAGGTTAGCACATGG                                                    |
| DDB0214941-01 | CACACATGGAAACAACTCTCACTG                                                  |
| DDB0214941-02 | CACGATCTATTTGTTGGATATATCTC                                                |
| DDB0167552-01 | GGATGTCACAATCAGAAAATGTTGC                                                 |
| DDB0167552-02 | CTACCACCAGTGTATCCACC                                                      |
| DDB0214895-01 | CACTTGGTCAAGTTGTATCTGC                                                    |
| DDB0214895-02 | CGG CATGGATTTGAATGATAAACG                                                 |
| DDB0191229-01 | CCATTCTTTTACCACTCCTTCATCTC                                                |
| DDB0191229-02 | TAGCGATTGAAGCTGGTGG                                                       |
| DDB0206011-01 | ACATTTAGCATCCTCACCACC                                                     |
| DDB0206011-02 | GTGAGCAATACCATAGAGATGATG                                                  |
| DDB0189346-01 | TGATGGTACTCGTGTTCCAG                                                      |
| DDB0189346-02 | GAGAGTTGAAGAGATACGCC                                                      |
| CMBF-37.3     | GGGTACCGGTTTAATGTCTCATTTTTCTGG                                            |
| CMBF-40.1     | CCCTCGAGTTATTTTTTATTATTATAAAAAGTTCTTGTTTTAC                               |
| attB1-CMBF01  | GGGACAAGTTTGTACAAAAAAGCAGGCTTCACCATGGGTTTAATGT<br>CTCATTTTTCTGG           |
| attB2-CMBF02  | GGGACCACTTTGTACAAGAAAGCTGGGTTATTTTTTATTATTATAAA<br>GTTCTTGTTTTACATATAAACC |
| cAK-01        | AGATCTACCGGTGGATCCGAAAGATATTCAGAAATGGAATTAATTAAT<br>TCACC                 |

|        |                                           |
|--------|-------------------------------------------|
| cAK-02 | ACCGGTAATCAAGTTGGAAATTTGAAAAGAATACTCAAG   |
| cAK-03 | CCATGGCAAATTATTTTGTACCGTGTATATACAATAATTG  |
| cAK-04 | AGATCTCATATTAATAAATTAAGTATATTATCAACACTAGG |
| cAK-05 | GGATCCTCTAGAGCAGGCCTTGCGCAACACGATG        |
| cAK-06 | CGGATCCAGTCTTGTACAGCTCGTCCATGC            |
